# Supplementary material for: Naked-eye repeatable off–on–off and on–off–on switching luminescence of copper(i)-1H-imidazo[4,5-f][1,10]phenanthroline complexes with reversible acid–base responses
Source: Royal Society of Chemistry journal article supplement (doi:10.1039/c8dt04538k), 2019-01-01
Supplement: c8dt04538k1.pdf [file c8dt04538k1.pdf]

**Smart Naked-Eye Repeatable off-on-off and on-off-on Switching  
Luminescent Copper(I)-1H-imidazo[4,5-f][1,10]phenanthroline  
Complexes with Reversible Acid-Base Responses**

Ying Shi, Xia Liu, Yuyu Shan, Weibo Kong, Yuenan Lu, Zhidan Tan, Xiu-Ling  
Li\*

School of Chemistry and Materials Science & Jiangsu Key Laboratory of Green Synthetic  
Chemistry for Functional Materials, Jiangsu Normal University, Xuzhou, Jiangsu 221116, China

**Table S1.** Crystallographic data and select refinement details for **1a**, **2b**·2CH<sub>2</sub>Cl<sub>2</sub>·H<sub>2</sub>O and **3b**·MeOH·H<sub>2</sub>O

|                                                              | <b>1a</b>                                                                       | <b>2b</b> ·2CH <sub>2</sub> Cl <sub>2</sub> ·H <sub>2</sub> O                                  | <b>3b</b> ·MeOH·H <sub>2</sub> O                                               |
|--------------------------------------------------------------|---------------------------------------------------------------------------------|------------------------------------------------------------------------------------------------|--------------------------------------------------------------------------------|
| Empirical formula                                            | C <sub>59</sub> H <sub>42</sub> CuF <sub>6</sub> N <sub>4</sub> OP <sub>3</sub> | C <sub>64</sub> H <sub>51</sub> Cl <sub>4</sub> CuN <sub>4</sub> O <sub>2</sub> P <sub>2</sub> | C <sub>68</sub> H <sub>51</sub> CuN <sub>4</sub> O <sub>2</sub> P <sub>2</sub> |
| Formula weight                                               | 1093.41                                                                         | 1175.36                                                                                        | 1081.60                                                                        |
| <i>T</i> (K)                                                 | 150(2)                                                                          | 150(2)                                                                                         | 150(2)                                                                         |
| Wavelength (Å)                                               | 0.71073                                                                         | 0.71073                                                                                        | 0.71073                                                                        |
| Crystal system                                               | monoclinic                                                                      | triclinic                                                                                      | triclinic                                                                      |
| Space group                                                  | <i>C</i> 2/ <i>c</i>                                                            | <i>P</i> $\bar{1}$                                                                             | <i>P</i> $\bar{1}$                                                             |
| Unit cell dimensions                                         |                                                                                 |                                                                                                |                                                                                |
| <i>a</i> (Å)                                                 | 42.967(2)                                                                       | 11.7392(4)                                                                                     | 11.303(4)                                                                      |
| <i>b</i> (Å)                                                 | 11.6599(6)                                                                      | 16.1442(5)                                                                                     | 13.704(4)                                                                      |
| <i>c</i> (Å)                                                 | 24.2264(12)                                                                     | 16.9695(6)                                                                                     | 21.312(7)                                                                      |
| $\alpha$ (°)                                                 | 90                                                                              | 65.6720(10)                                                                                    | 105.655(4)                                                                     |
| $\beta$ (°)                                                  | 116.906(2)                                                                      | 72.0060(10)                                                                                    | 100.773(4)                                                                     |
| $\gamma$ (°)                                                 | 90                                                                              | 82.8840(10)                                                                                    | 101.648(4)                                                                     |
| <i>V</i> (Å <sup>3</sup> )                                   | 10823.5(10)                                                                     | 2787.13(16)                                                                                    | 3009.6(16)                                                                     |
| <i>Z</i>                                                     | 8                                                                               | 2                                                                                              | 2                                                                              |
| <i>D</i> <sub>calc</sub> (Mg·m <sup>-3</sup> )               | 1.342                                                                           | 1.401                                                                                          | 1.194                                                                          |
| $\mu$ (mm <sup>-1</sup> )                                    | 0.557                                                                           | 0.691                                                                                          | 0.462                                                                          |
| <i>F</i> (000)                                               | 4480                                                                            | 1212                                                                                           | 1124                                                                           |
| Reflections collected                                        | 46417                                                                           | 43145                                                                                          | 18224                                                                          |
| Independent reflections                                      | 12558                                                                           | 14575                                                                                          | 13256                                                                          |
| Reflections with <i>I</i> > 2 $\sigma$ ( <i>I</i> )          | 8260                                                                            | 12763                                                                                          | 10210                                                                          |
| Data/restraints/parameters                                   | 12558/1/671                                                                     | 14575/0/705                                                                                    | 13256/0/695                                                                    |
| Goodness-of-fit (GOF) on <i>F</i> <sup>2</sup>               | 1.023                                                                           | 1.061                                                                                          | 1.038                                                                          |
| Final <i>R</i> indices [ <i>I</i> > 2 $\sigma$ ( <i>I</i> )] | 0.0549                                                                          | 0.0386                                                                                         | 0.0420                                                                         |
| <i>wR</i> <sub>2</sub> [ <i>I</i> > 2 $\sigma$ ( <i>I</i> )] | 0.1434                                                                          | 0.1112                                                                                         | 0.1055                                                                         |
| <i>R</i> indices (all data)                                  | 0.0901                                                                          | 0.0443                                                                                         | 0.0594                                                                         |
| <i>wR</i> <sub>2</sub> (all data)                            | 0.1708                                                                          | 0.1150                                                                                         | 0.1141                                                                         |

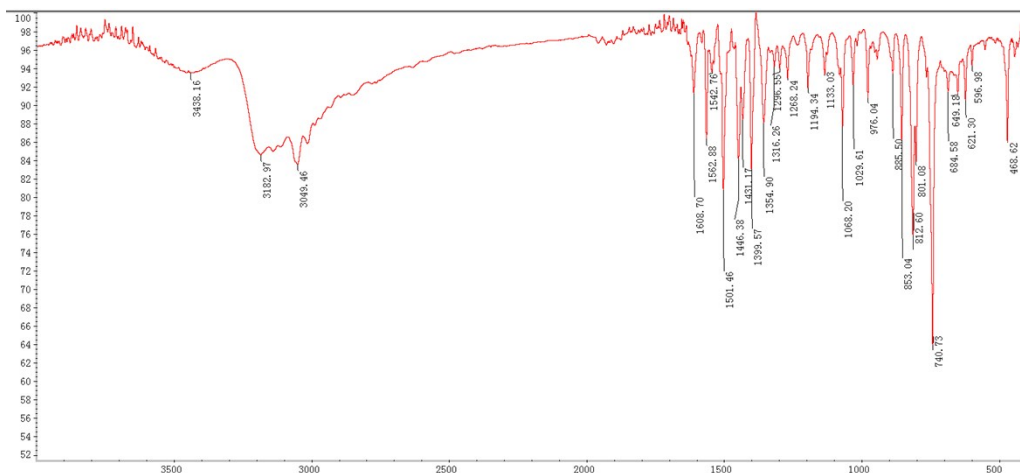

Figure S1. IR spectra of nimph (*X*-axis: cm<sup>-1</sup>; *Y*-axis: transmittance).

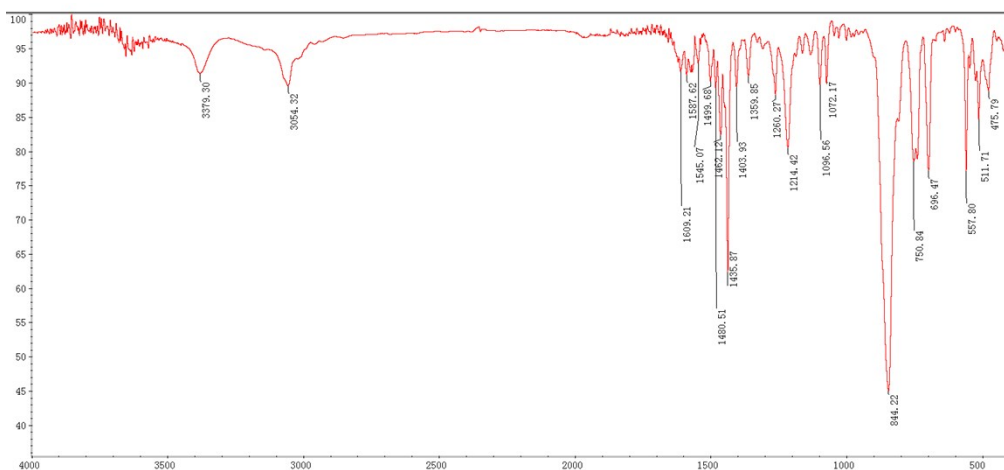

Figure S2. IR spectra of complex **1a**. (*X*-axis: cm<sup>-1</sup>; *Y*-axis: transmittance).

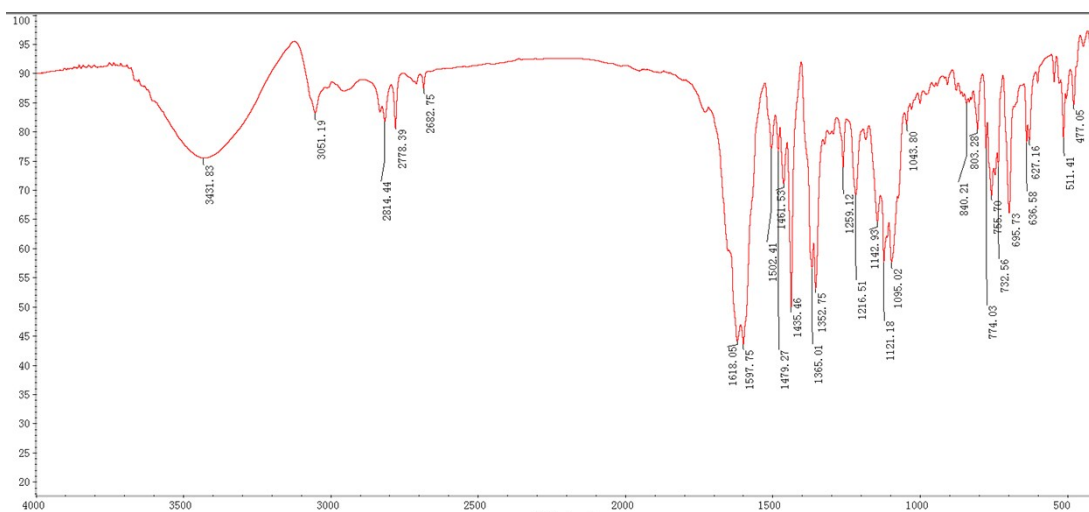

Figure S3. IR spectra of complex **1b**. (*X*-axis: cm<sup>-1</sup>; *Y*-axis: transmittance).

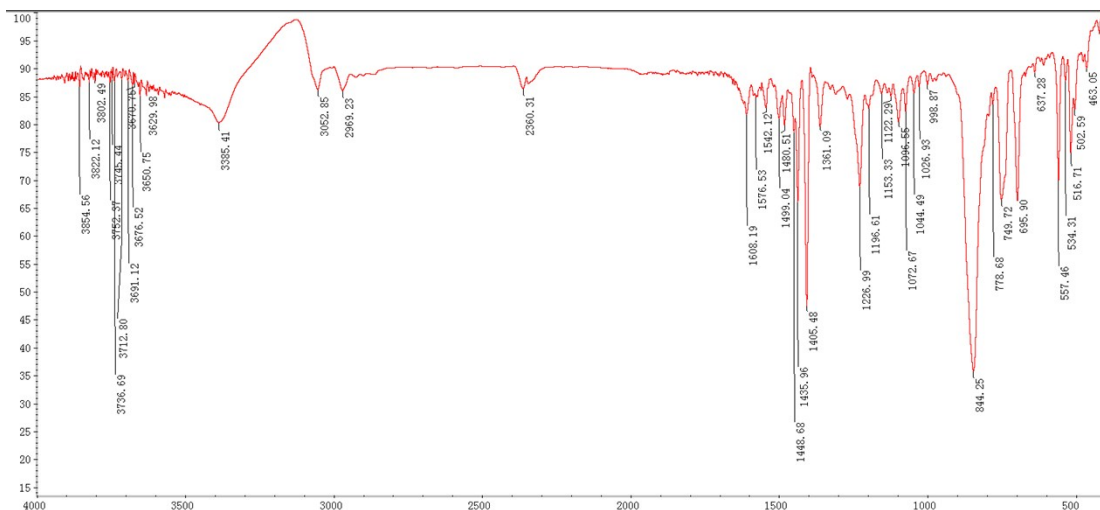

Figure S4. IR spectra of complex **2a**. (X-axis:  $\text{cm}^{-1}$ ; Y-axis: transmittance).

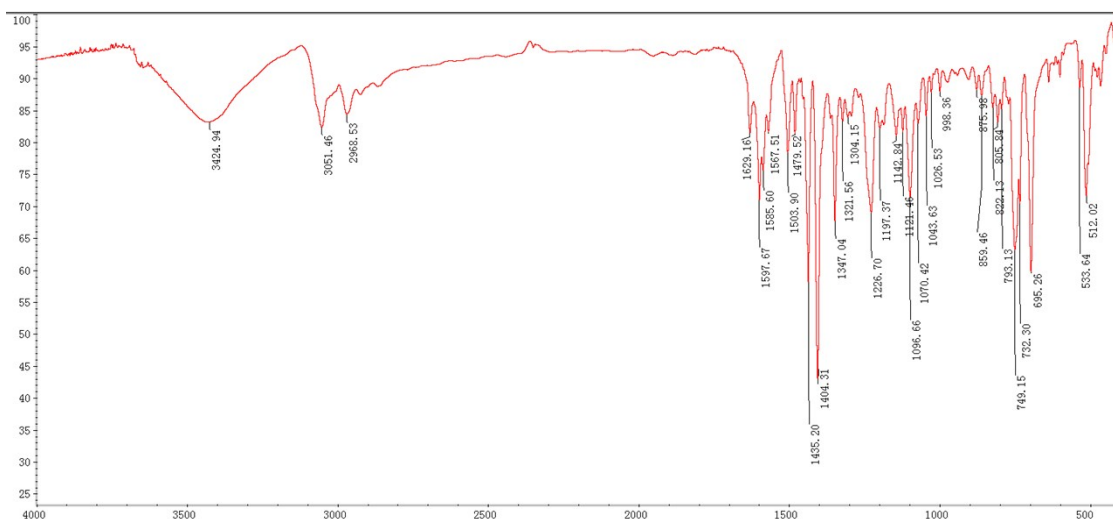

Figure S5. IR spectra of complex **2b**. (X-axis:  $\text{cm}^{-1}$ ; Y-axis: transmittance).

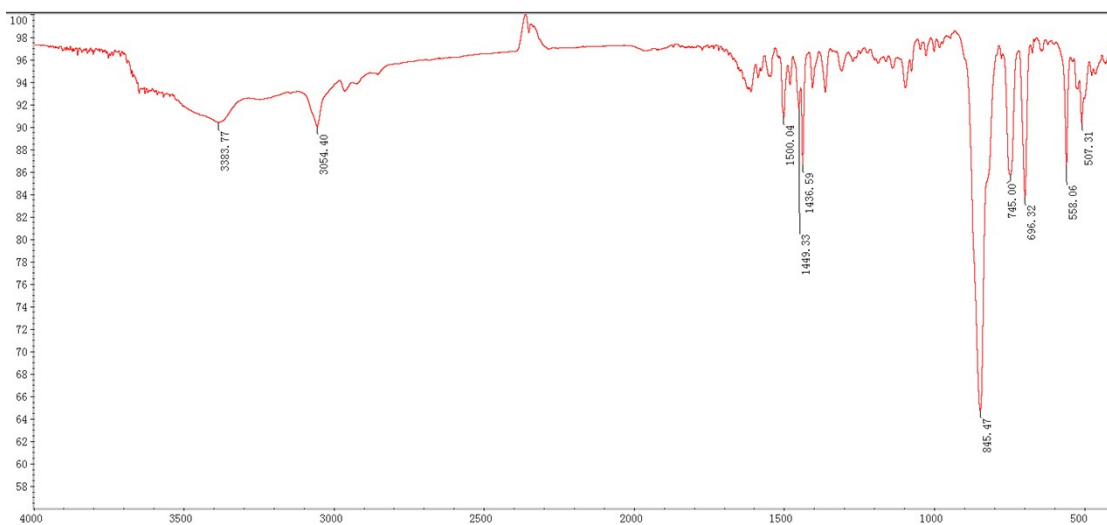

Figure S6. IR spectra of complex **3a**. (X-axis:  $\text{cm}^{-1}$ ; Y-axis: transmittance).

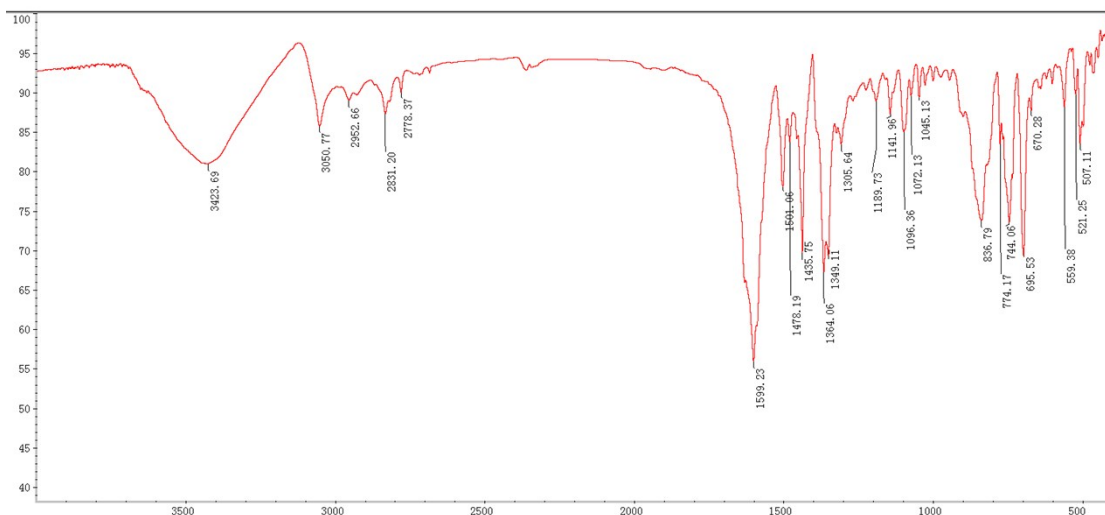

Figure S7. IR spectra of complex **3b**. (X-axis:  $\text{cm}^{-1}$ ; Y-axis: transmittance).

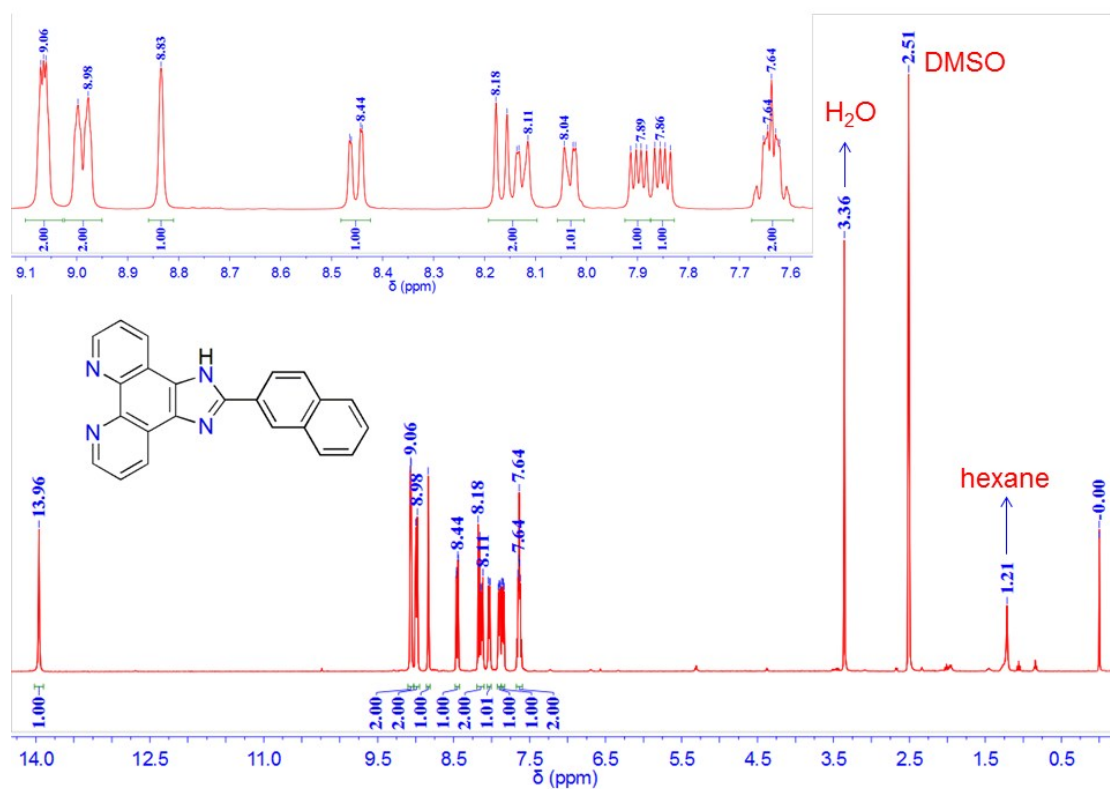

Figure S8.  $^1\text{H}$  NMR spectrum of nimph in  $\text{DMSO}-d_6$ .

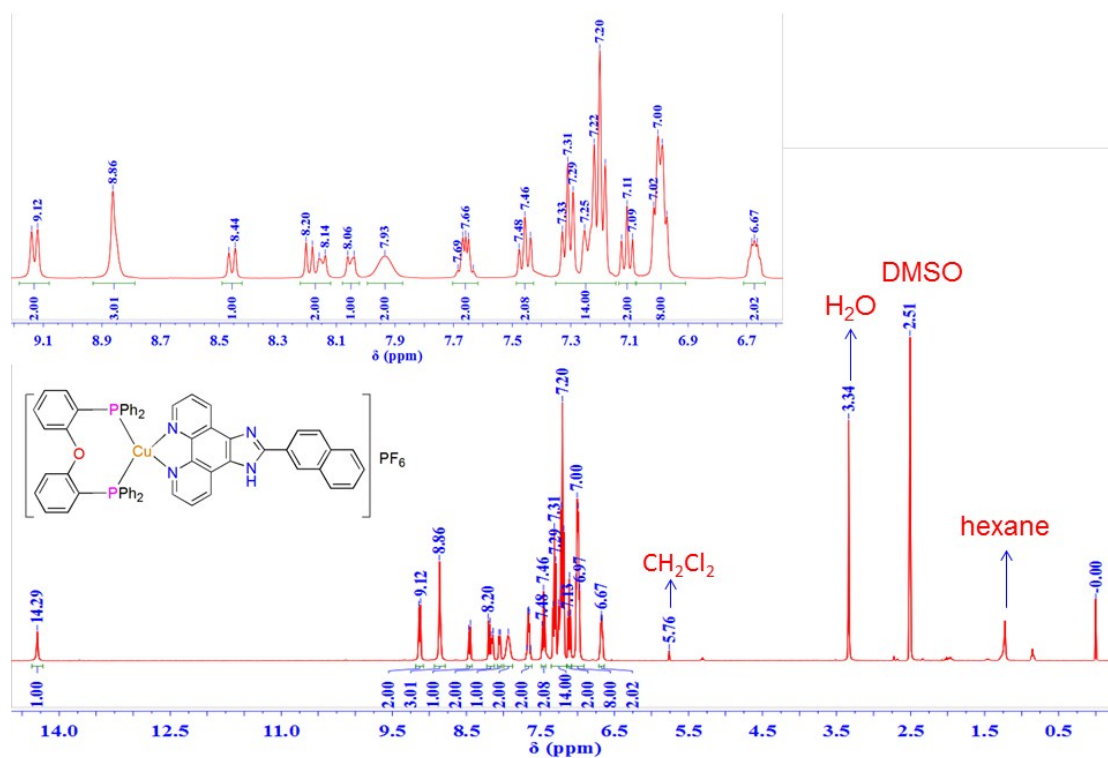

Figure S9. <sup>1</sup>H NMR spectrum of **1a** in DMSO-*d*<sub>6</sub>.

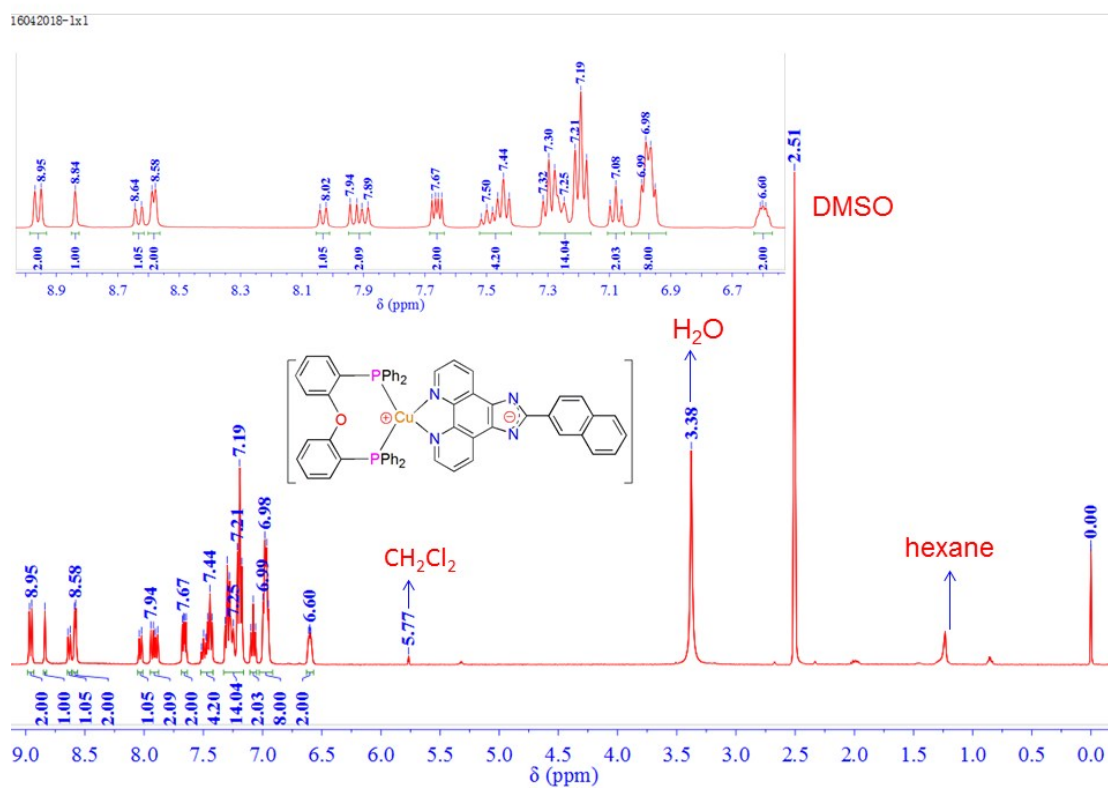

Figure S10. <sup>1</sup>H NMR spectrum of **1b** in DMSO-*d*<sub>6</sub>.

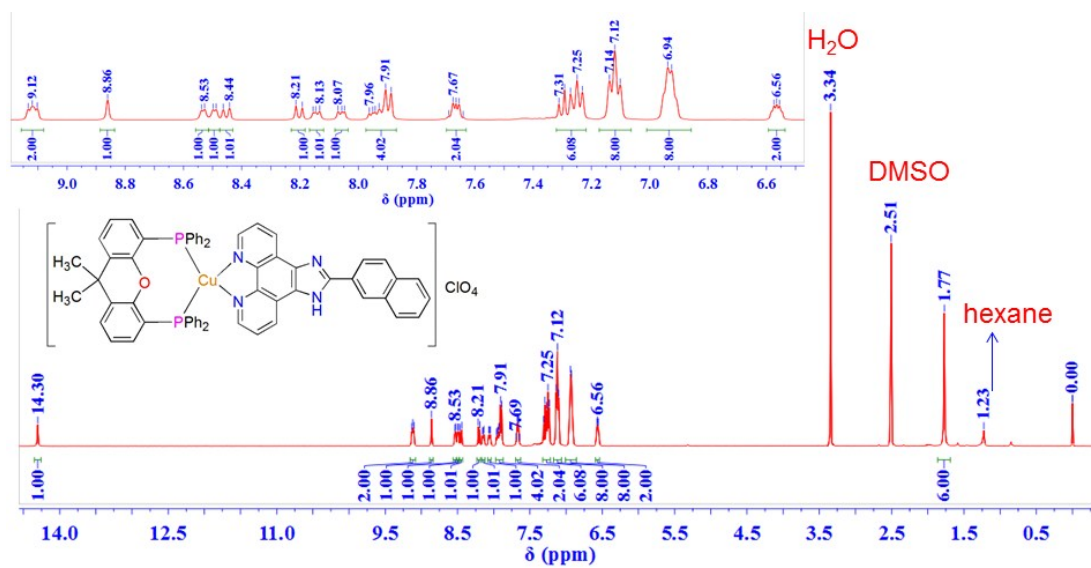

Figure S11. <sup>1</sup>H NMR spectrum of **2a** in DMSO-*d*<sub>6</sub>.

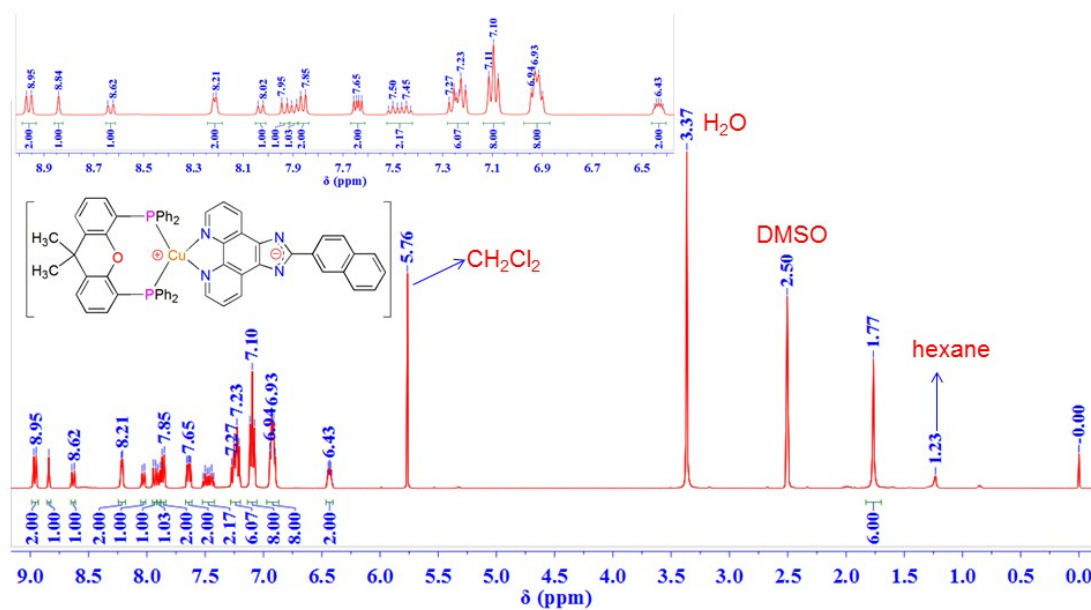

Figure S12. <sup>1</sup>H NMR spectrum of **2b** in DMSO-*d*<sub>6</sub>.

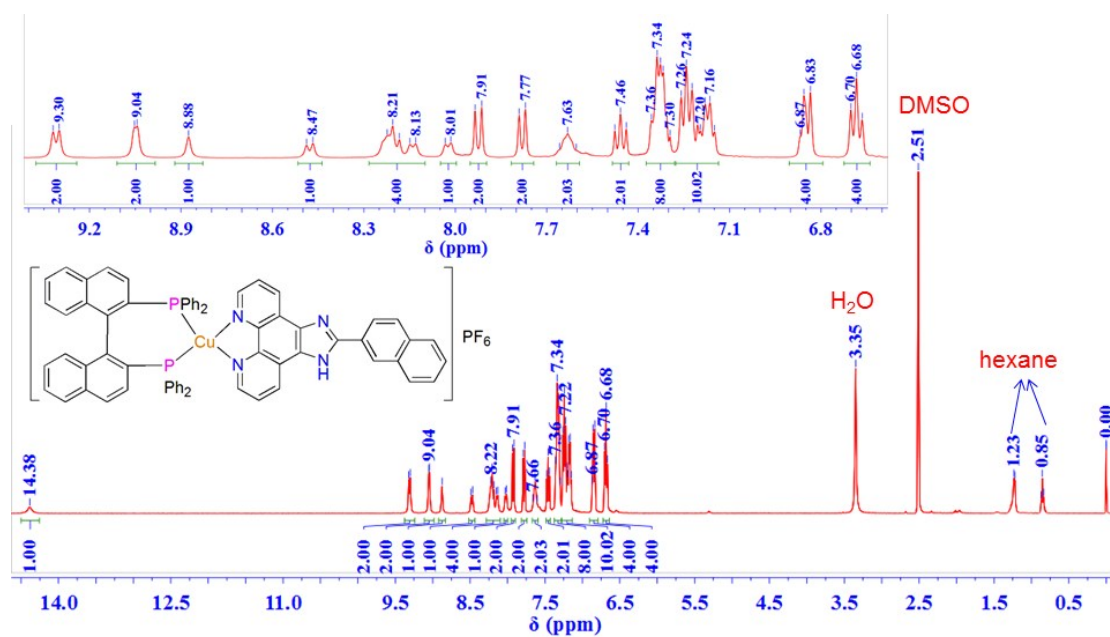

Figure S13.  $^1\text{H}$  NMR spectrum of **3a** in  $\text{DMSO-}d_6$ .

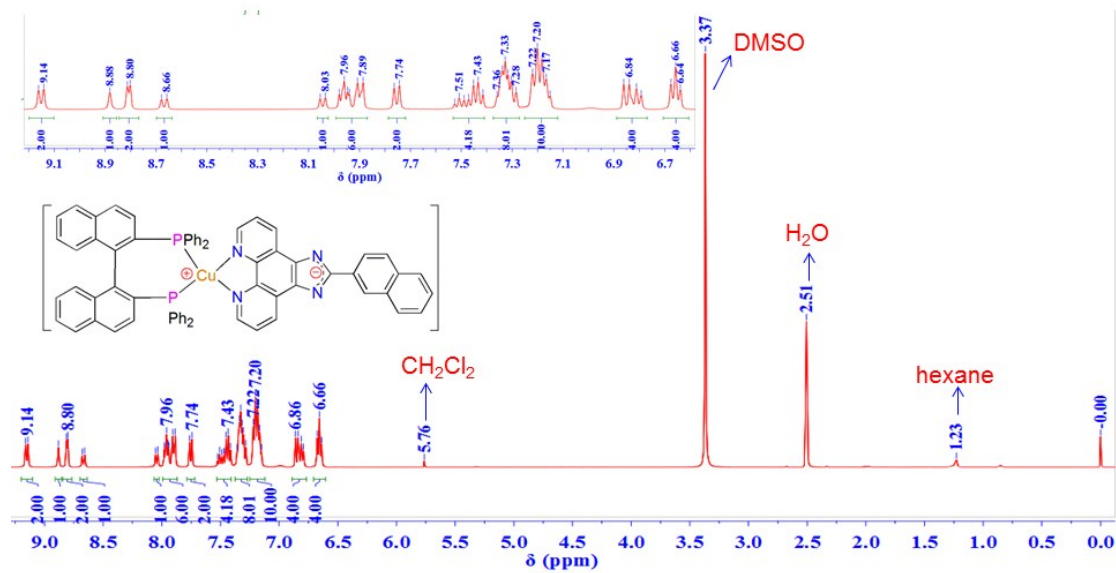

Figure S14.  $^1\text{H}$  NMR spectrum of **3b** in  $\text{DMSO-}d_6$ .



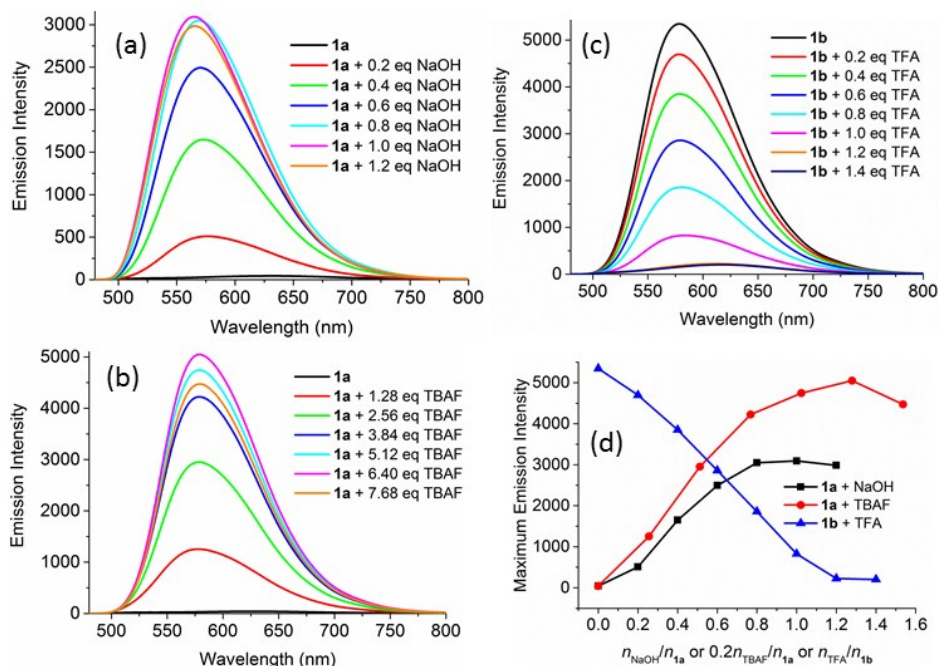

Figure S15. (a) Changes observed in the emission spectra of complex **1a** ( $2.5 \times 10^{-5} \text{ mol}\cdot\text{L}^{-1}$ ) in DCM upon adding NaOH solution in MeOH ( $1.0 \times 10^{-3} \text{ mol}\cdot\text{L}^{-1}$ ) at 298 K, (b) Changes observed in the emission spectra of complex **1a** ( $2.5 \times 10^{-5} \text{ mol}\cdot\text{L}^{-1}$ ) in DCM upon adding TBAF solution in DCM ( $6.4 \times 10^{-3} \text{ mol}\cdot\text{L}^{-1}$ ) at 298 K, (c) Changes observed in the emission spectra of complex **1b** ( $2.5 \times 10^{-5} \text{ mol}\cdot\text{L}^{-1}$ ) in DCM upon adding TFA solution in DCM ( $1.0 \times 10^{-3} \text{ mol}\cdot\text{L}^{-1}$ ) at 298 K and (d) changes of the maximum emission intensity of **1a** and **1b** upon adding different proportions of NaOH, TBAF and TFA.

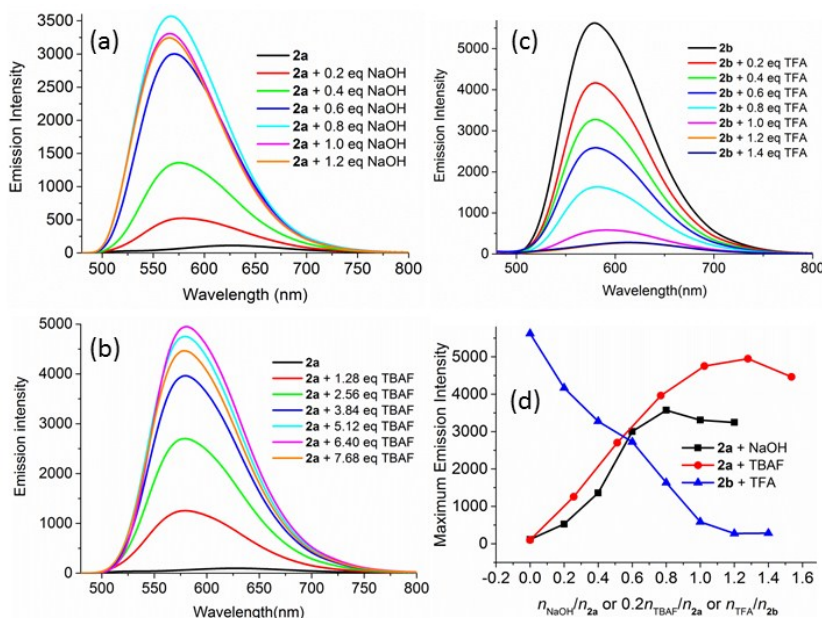

Figure S16. (a) Changes observed in the emission spectra of complex **2a** ( $2.5 \times 10^{-5} \text{ mol}\cdot\text{L}^{-1}$ ) in DCM upon adding NaOH solution in MeOH ( $1.0 \times 10^{-3} \text{ mol}\cdot\text{L}^{-1}$ ) at 298 K, (b) Changes observed in the emission spectra of complex **2a** ( $2.5 \times 10^{-5} \text{ mol}\cdot\text{L}^{-1}$ ) in DCM upon adding TBAF solution in DCM ( $6.4 \times 10^{-3} \text{ mol}\cdot\text{L}^{-1}$ ) at 298 K, (c) Changes observed in the emission spectra of complex **2b** ( $2.5 \times 10^{-5} \text{ mol}\cdot\text{L}^{-1}$ ) in DCM upon adding TFA solution in DCM ( $1.0 \times 10^{-3} \text{ mol}\cdot\text{L}^{-1}$ ) at 298 K and (d) changes of the maximum emission intensity of **2a** and **2b** upon adding different proportions of NaOH, TBAF and TFA.

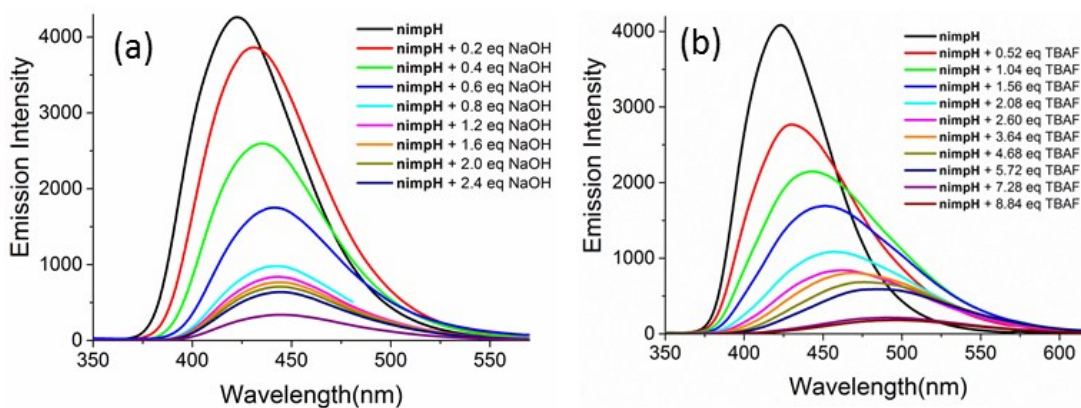

Figure S17. (a) Changes observed in the emission spectra of the free ligand  $\text{nimpH}$  ( $2.5 \times 10^{-5} \text{ mol}\cdot\text{L}^{-1}$ ) in DCM upon adding NaOH solution in MeOH ( $1.0 \times 10^{-3} \text{ mol}\cdot\text{L}^{-1}$ ) at 298 K, (b) Changes observed in the emission spectra of the free ligand  $\text{nimpH}$  ( $2.5 \times 10^{-5} \text{ mol}\cdot\text{L}^{-1}$ ) in DCM upon adding TBAF solution in DCM ( $2.6 \times 10^{-3} \text{ mol}\cdot\text{L}^{-1}$ ) at 298 K. All the emission spectra were obtained upon excitation at 285 nm.

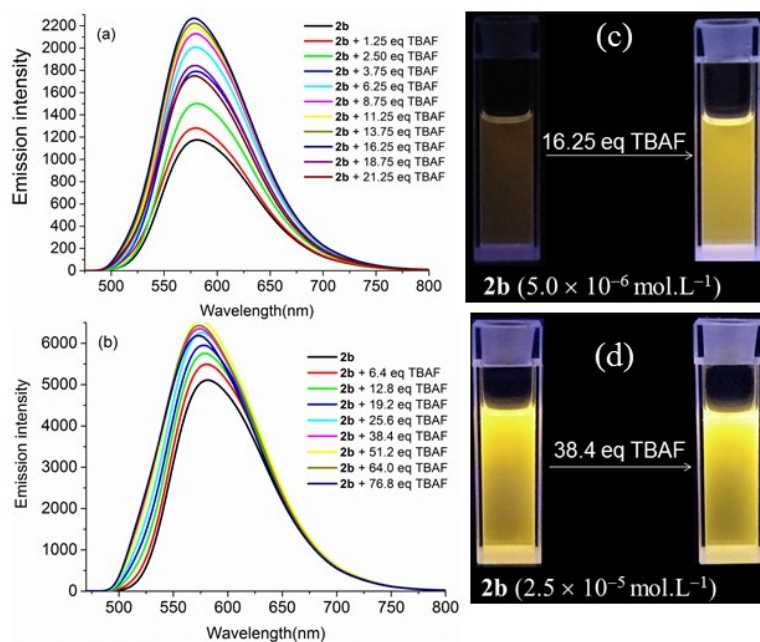

Figure S18. (a) Changes observed in the emission spectra of complex  $\mathbf{2b}$  ( $5.0 \times 10^{-6} \text{ mol}\cdot\text{L}^{-1}$ ) in DCM upon adding TBAF solution in DCM ( $1.25 \times 10^{-3} \text{ mol}\cdot\text{L}^{-1}$ ) at 298 K; (b) Changes observed in the emission spectra of complex  $\mathbf{2b}$  ( $2.5 \times 10^{-5} \text{ mol}\cdot\text{L}^{-1}$ ) in DCM upon adding TBAF solution in DCM ( $3.20 \times 10^{-2} \text{ mol}\cdot\text{L}^{-1}$ ) at 298 K; (c) and (d) Luminescent images of  $\mathbf{2b}$  radiated with an ultraviolet light at 365 nm before and after addition of TBAF.

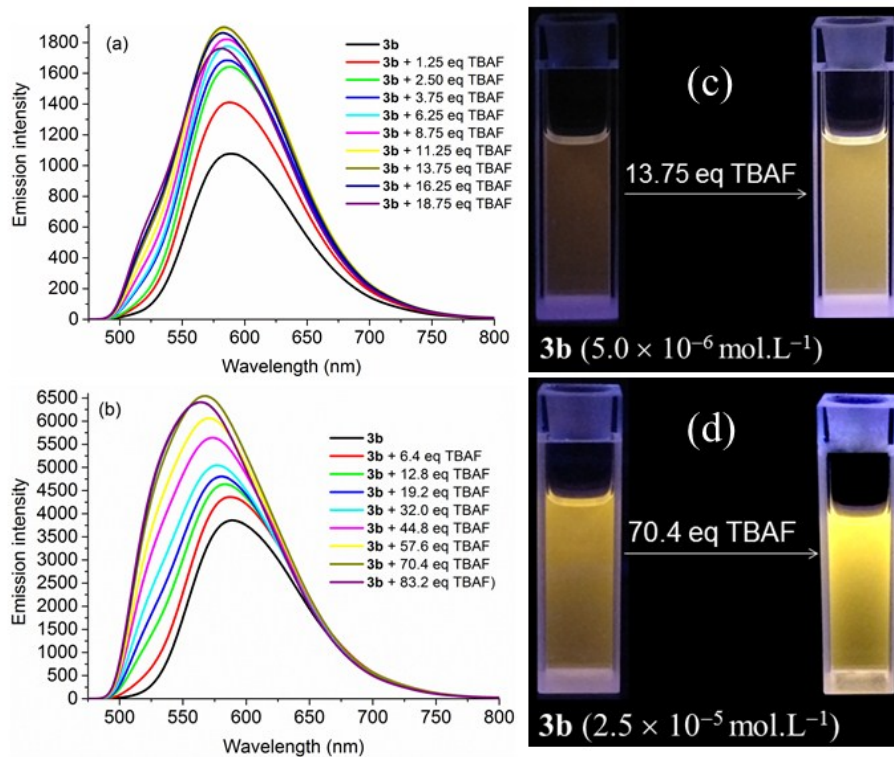

Figure S19 (a) Changes observed in the emission spectra of complex **3b** ( $5.0 \times 10^{-6} \text{ mol.L}^{-1}$ ) in DCM upon adding TBAF solution in DCM ( $1.25 \times 10^{-3} \text{ mol.L}^{-1}$ ) at 298 K; (b) Changes observed in the emission spectra of complex **3b** ( $2.5 \times 10^{-5} \text{ mol.L}^{-1}$ ) in DCM upon adding TBAF solution in DCM ( $3.20 \times 10^{-2} \text{ mol.L}^{-1}$ ) at 298 K; (c) and (d) Luminescent images of **3b** radiated with an ultraviolet light at 365 nm before and after addition of TBAF.

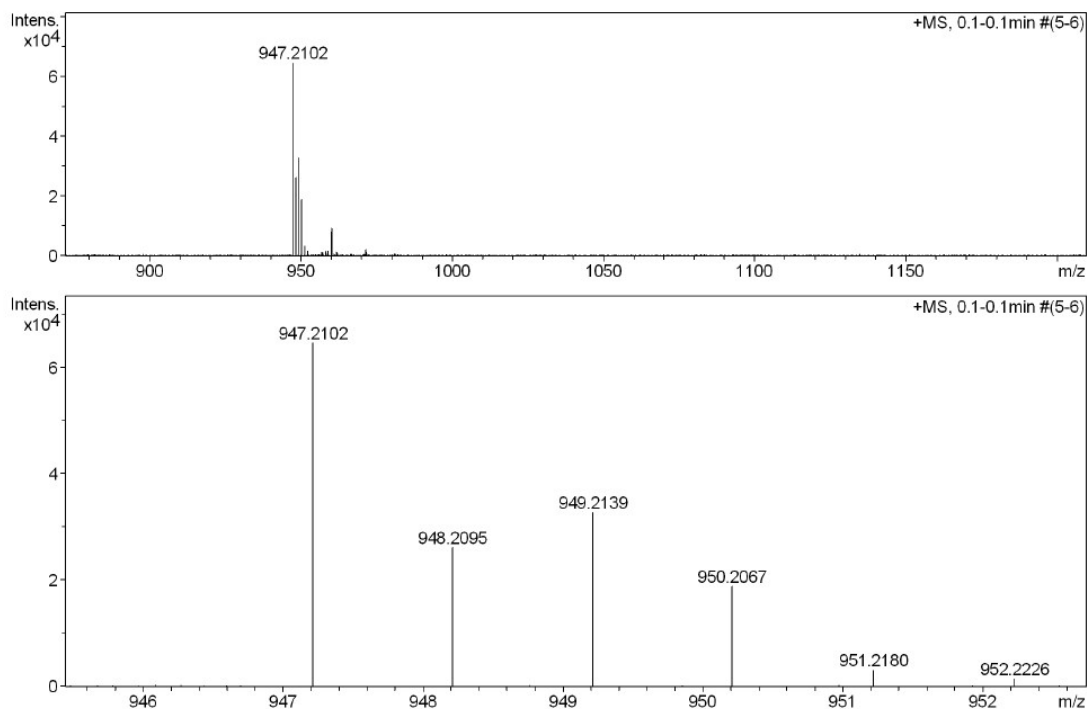

Figure S20. ESI-MS spectra of complex **1a** with collision cell energy at 10 ev.

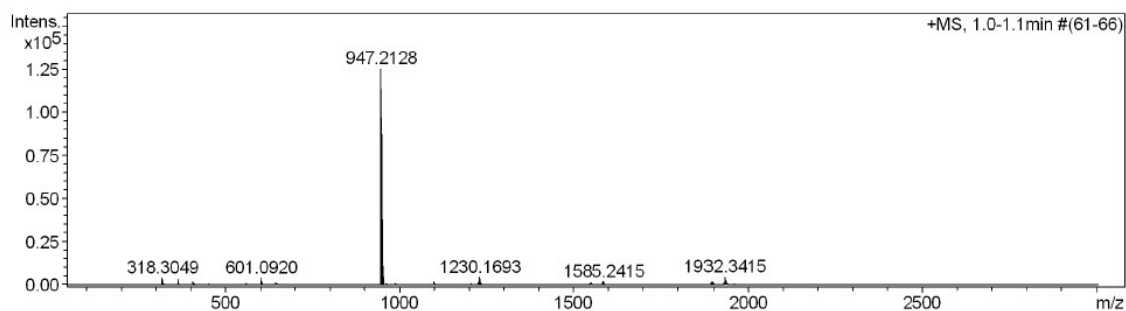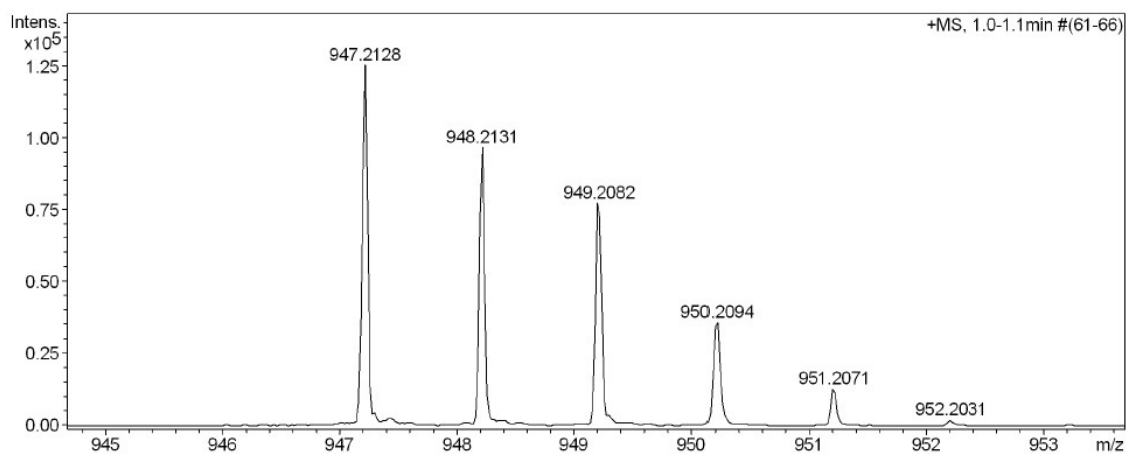

Figure S21. ESI-MS spectra of complex **1b** with collision cell energy at 10 ev.

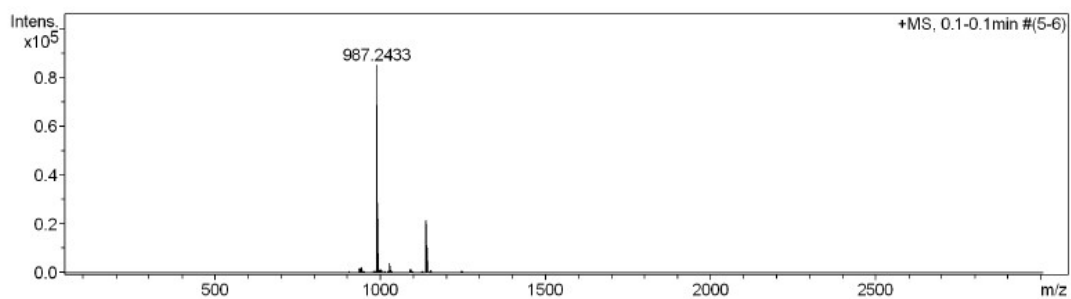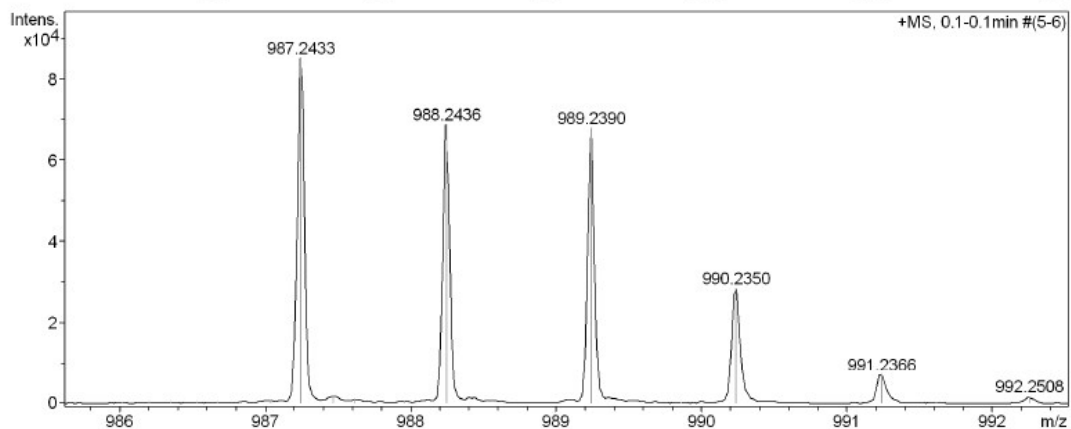

Figure S22. ESI-MS spectra of complex **2a** with collision cell energy at 10 ev.

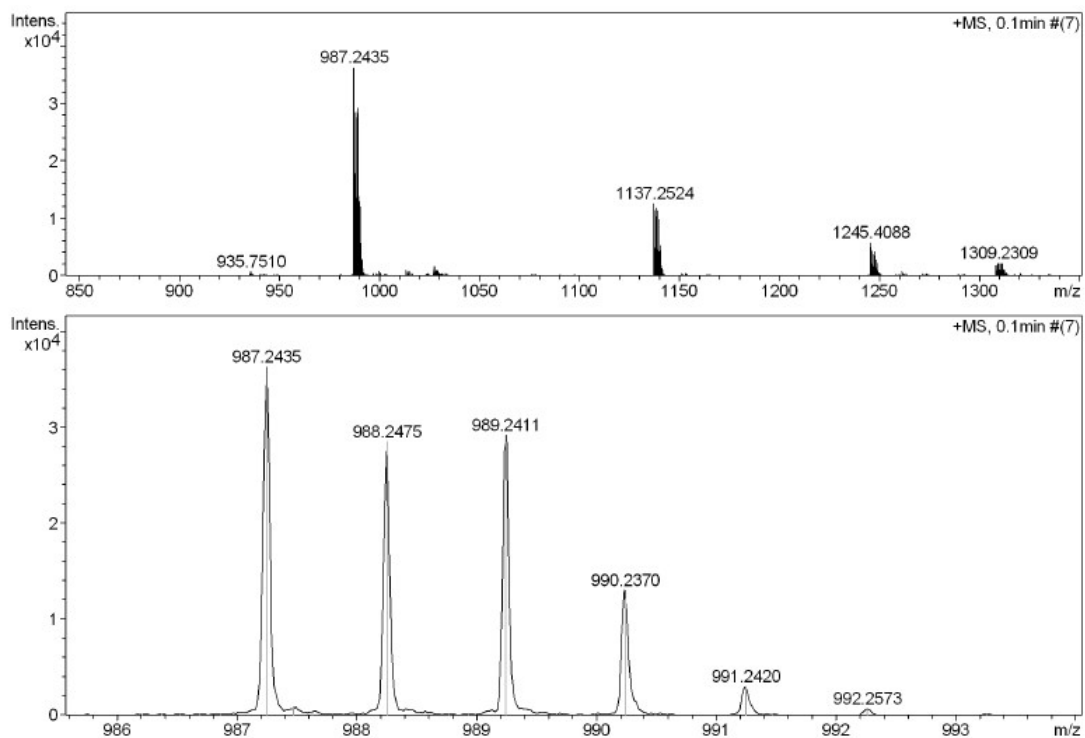

Figure S23. ESI-MS spectra of complex **2b** with collision cell energy at 10 eV.

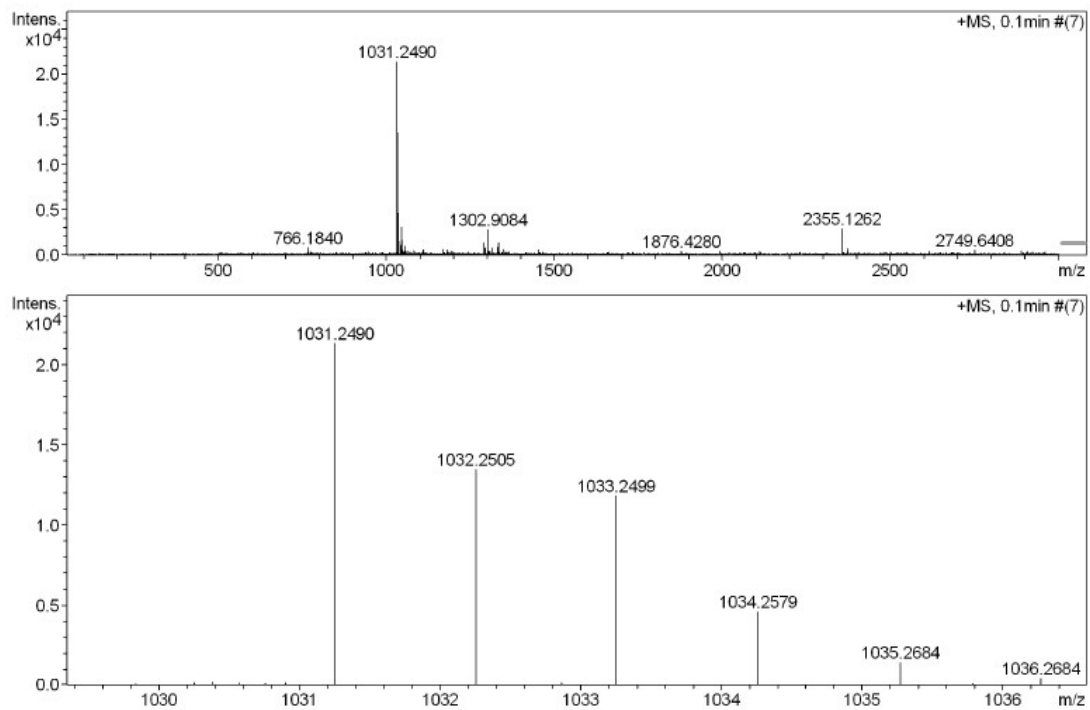

Figure S24. ESI-MS spectra of complex **3a** with collision cell energy at 10 eV.

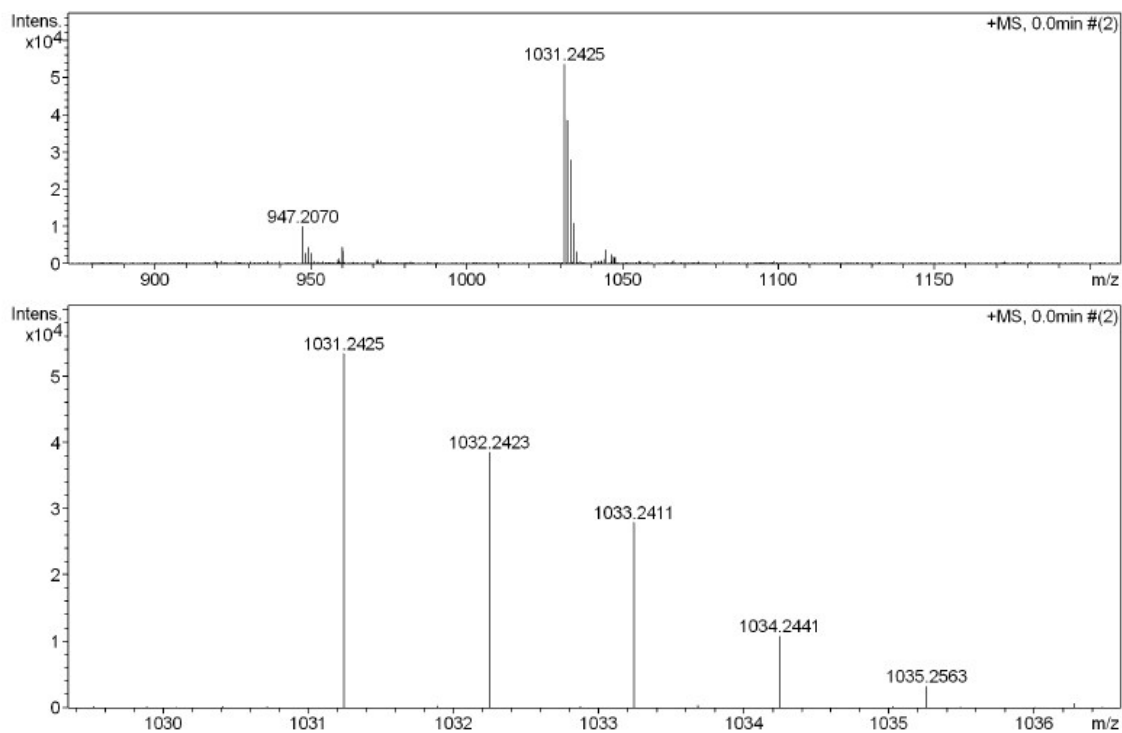

Figure S25. ESI-MS spectra of complex **3b** with collision cell energy at 10 eV.

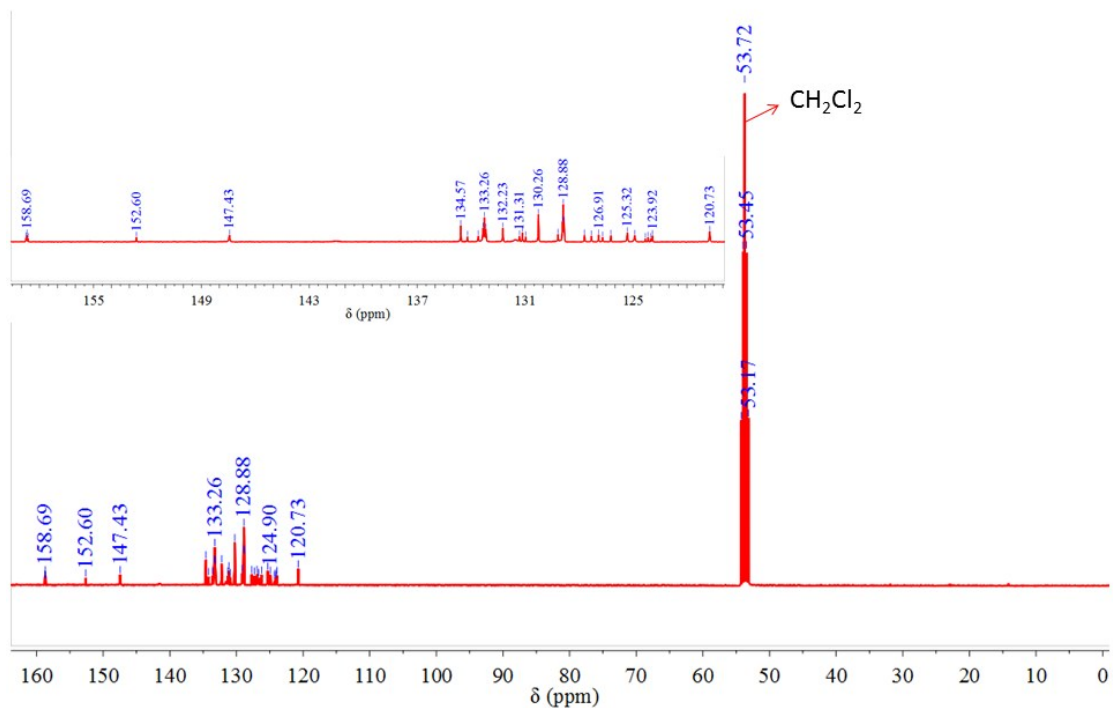

Figure S26.  $^{13}\text{C}$  NMR spectrum of **1a** in  $\text{CD}_2\text{Cl}_2$ .

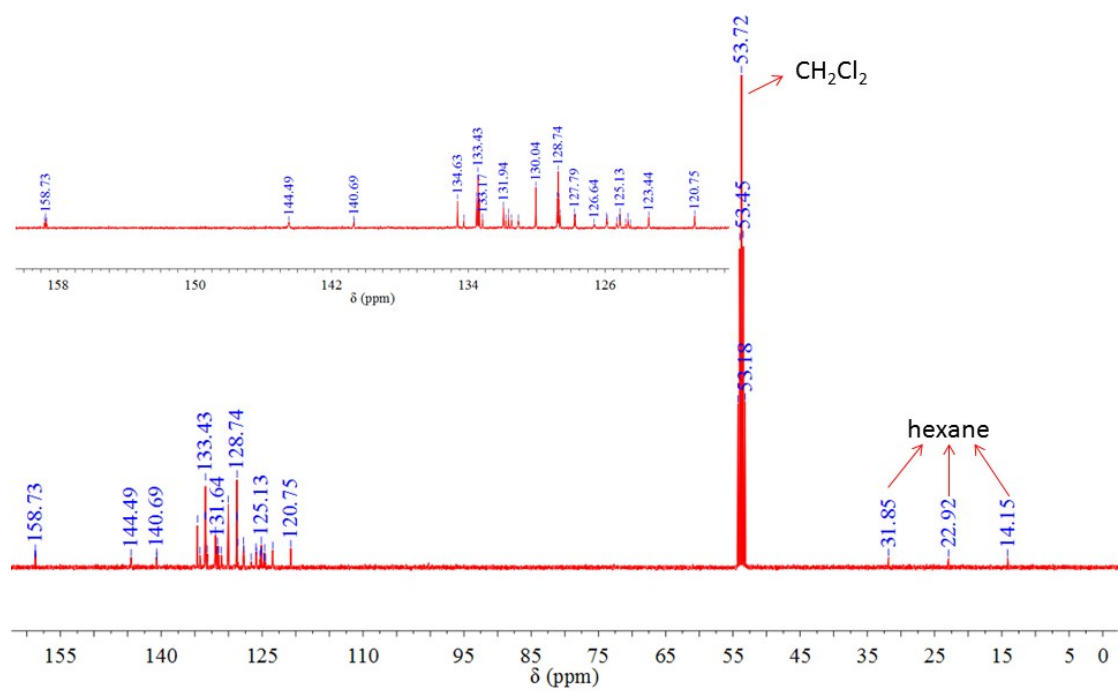

Figure S27.  $^{13}\text{C}$  NMR spectrum of **1b** in  $\text{CD}_2\text{Cl}_2$ .

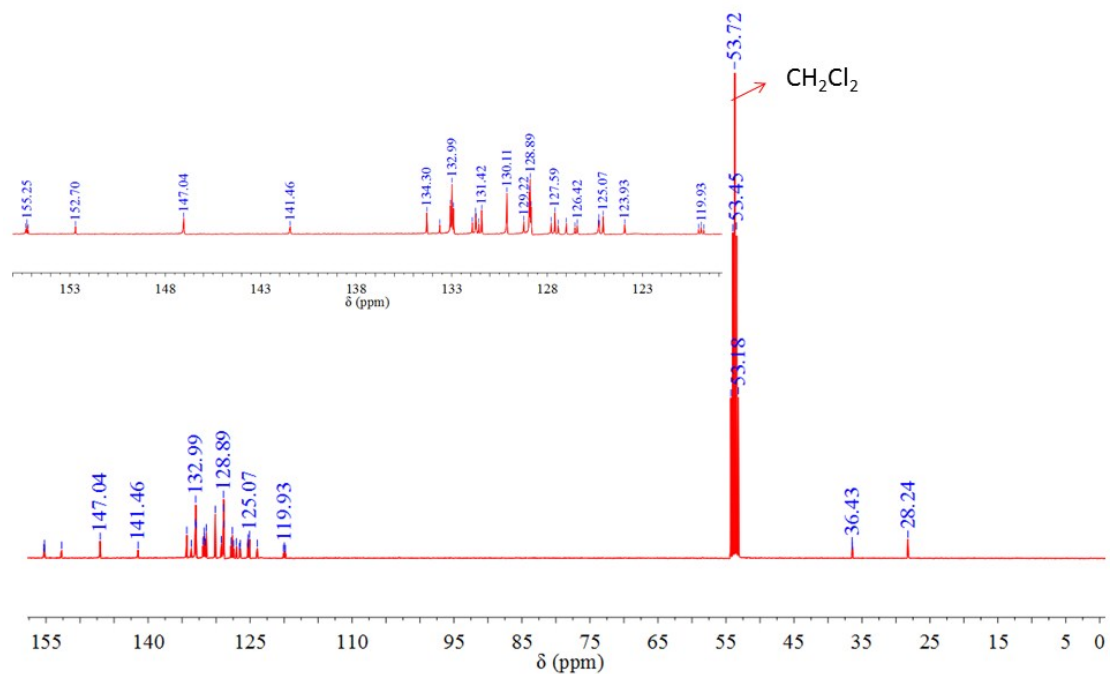

Figure S28.  $^{13}\text{C}$  NMR spectrum of **2a** in  $\text{CD}_2\text{Cl}_2$ .

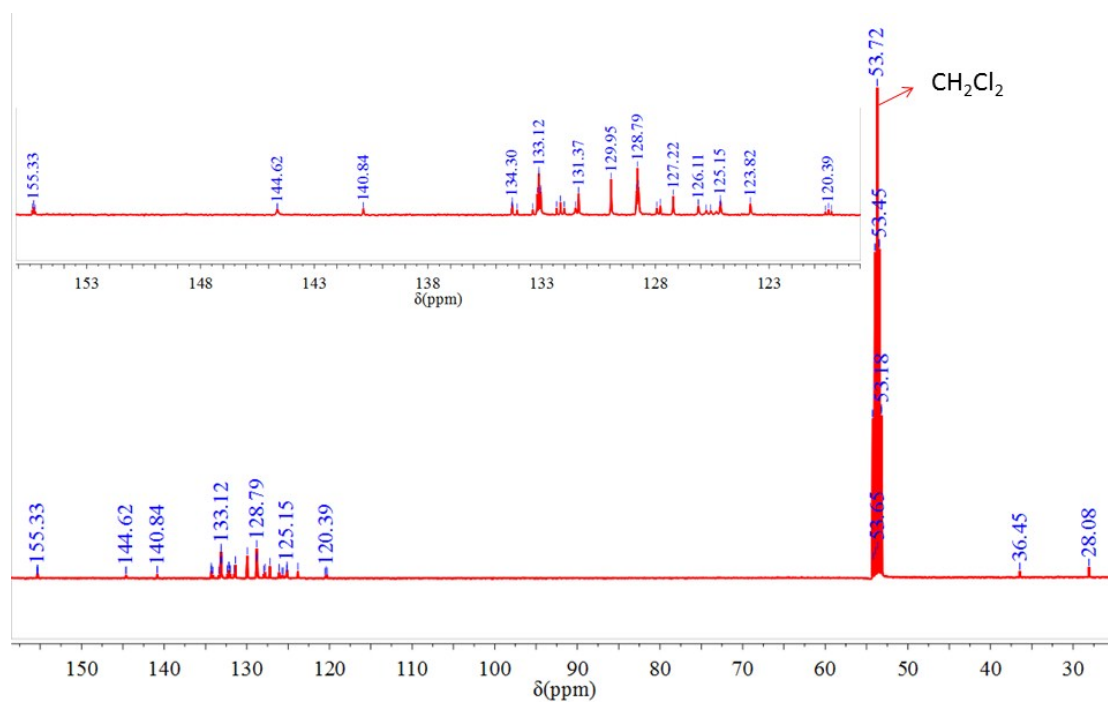

Figure S29.  $^{13}\text{C}$  NMR spectrum of **2b** in  $\text{CD}_2\text{Cl}_2$ .

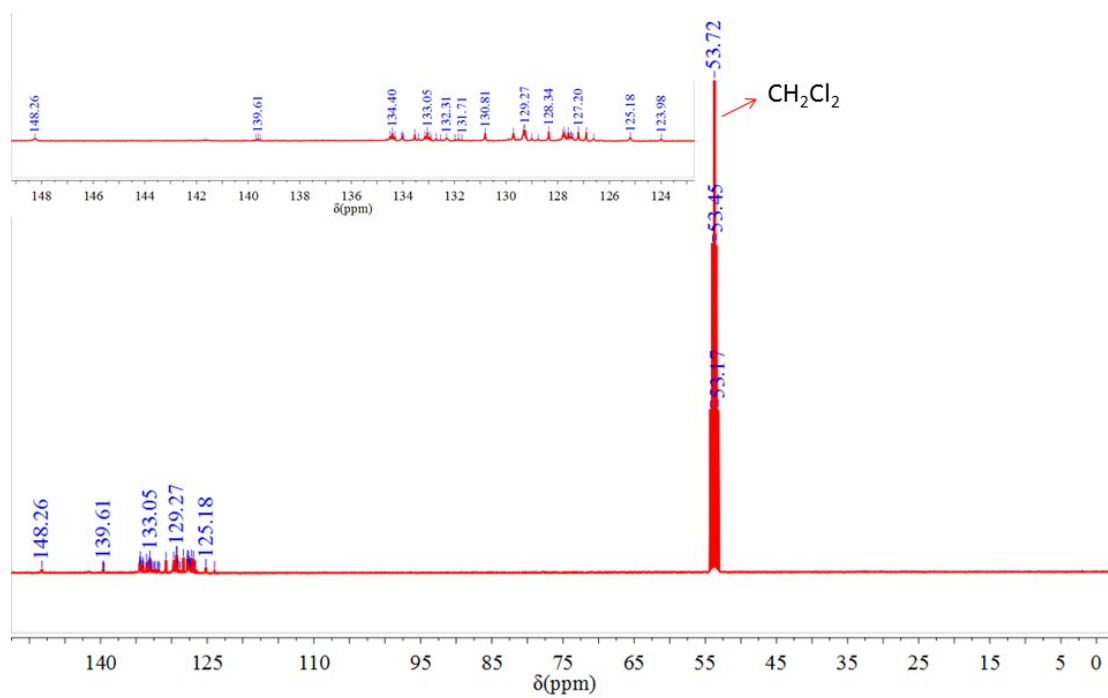

Figure S30.  $^{13}\text{C}$  NMR spectrum of **3a** in  $\text{CD}_2\text{Cl}_2$ .



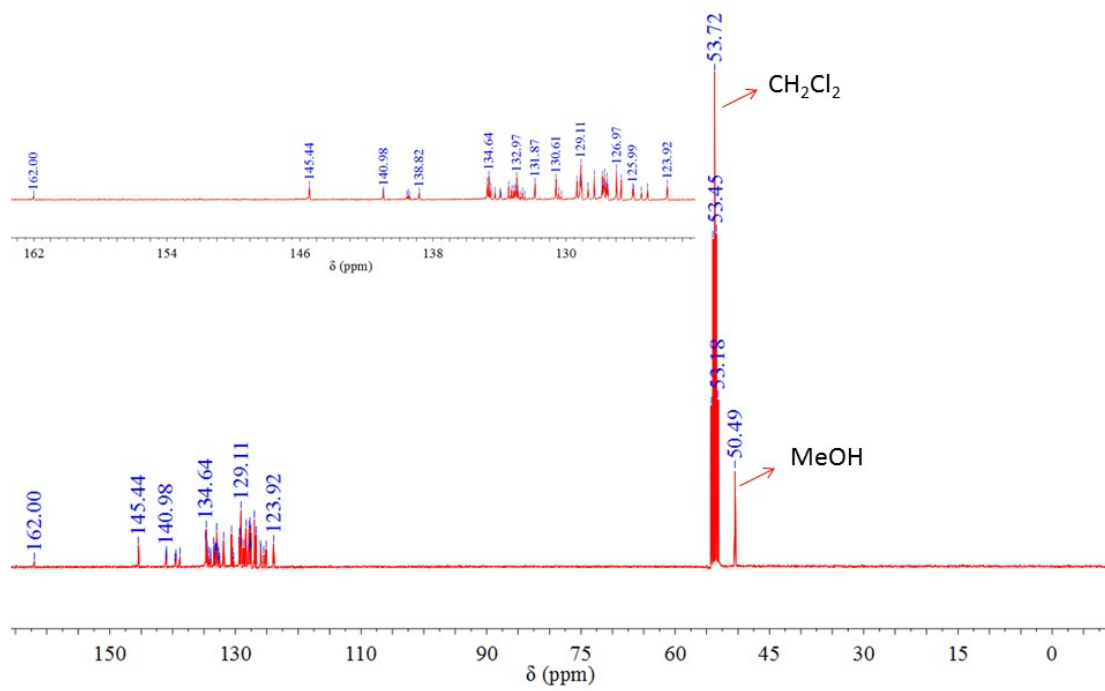

Figure S31. <sup>13</sup>C NMR spectrum of **3b** in CD<sub>2</sub>Cl<sub>2</sub>.
